# Supplementary material for: Influence of activated carbon on performance and microbial communities in the treatment of solvent pollutant mixtures in a continuous stirred tank reactor
Source: Royal Society of Chemistry journal article supplement (doi:10.1039/d0ew00096e), 2020-01-01
Supplement: d0ew00096e1.pdf [file d0ew00096e1.pdf]

**Supplementary material** of the paper published in the journal **Environmental Science: Water Research & Technology**, entitled *“Influence of activated carbon on performance and microbial communities in the treatment of solvent pollutant mixtures in a continuous stirred tank reactor”* co-authored by Pablo Ferrero, Marta Izquierdo, Francisco Javier Álvarez-Hornos, Josep Manuel Peña-Roja and Vicente Martínez-Soria.

**Table S1** Macronutrient and micronutrient supplementation in reactor.

| <b>Compound</b>                                  | <b>Dose, mg g<sup>-1</sup> COD</b> | <b>Compound</b>                                                                    | <b>Dose, mg g<sup>-1</sup> COD</b> |
|--------------------------------------------------|------------------------------------|------------------------------------------------------------------------------------|------------------------------------|
| NH <sub>4</sub> Cl                               | 15.7                               | H <sub>3</sub> BO <sub>3</sub>                                                     | 0.1143                             |
| Yeast extract                                    | 7.5                                | EDTANa                                                                             | 0.100                              |
| KCl                                              | 6.1                                | (NH <sub>4</sub> ) <sub>2</sub> Mo <sub>7</sub> O <sub>24</sub> ·4H <sub>2</sub> O | 0.0625                             |
| (NH <sub>4</sub> ) <sub>2</sub> HPO <sub>4</sub> | 5.6                                | Al <sub>2</sub> O <sub>3</sub>                                                     | 0.0595                             |
| FeCl <sub>3</sub> ·6H <sub>2</sub> O             | 0.4208                             | NiSO <sub>4</sub> ·6H <sub>2</sub> O                                               | 0.0447                             |
| CoCl <sub>2</sub> ·6H <sub>2</sub> O             | 0.1615                             | CuCl <sub>2</sub> ·2H <sub>2</sub> O                                               | 0.0134                             |
| MnCl <sub>2</sub> ·4H <sub>2</sub> O             | 0.1441                             | ZnSO <sub>4</sub> ·7H <sub>2</sub> O                                               | 0.132                              |
